# Supplementary material
Source: Springer Nature journal article supplement (https://www.springermedizin.de/resource/supplementary/13063_2013_2093_MOESM4_ESM.pdf/9621348)
Supplement: MOESM4 [file 9621348]

#### Additional file 4: Adverse events

| Adverse event                                                   | Sham Device | LIPUS |
|-----------------------------------------------------------------|-------------|-------|
| <b>Non-operative</b>                                            |             |       |
| pain at the site of screws                                      | 1           | 0     |
| superficial infection                                           | 0           | 3     |
| fracture blisters and boils                                     | 0           | 1     |
| pneumonia                                                       | 0           | 1     |
| pneumonia-like symptoms                                         | 1           | 0     |
| possible operation-related infection                            | 0           | 1     |
| low grade fever                                                 | 0           | 1     |
| fracture mal-union                                              | 0           | 2     |
| neurapraxia of the saphenous nerve                              | 0           | 1     |
| hospitalization for deep vein thrombosis and pulmonary embolism | 1           | 0     |
|                                                                 |             |       |
| <b>Operative</b>                                                |             |       |
| implant removal                                                 | 1           | 0     |
| implant exchange                                                | 0           | 0     |
| irrigation & debridement                                        | 1           | 5     |
| bone graft                                                      | 0           | 0     |
| pre-operative fasciotomy                                        | 0           | 0     |
| post-operative fasciotomy                                       | 0           | 1     |
| amputation                                                      | 0           | 0     |
| soft tissue infection                                           | 0           | 0     |
| screw removal                                                   | 5           | 3     |
| screw exchange                                                  | 0           | 0     |
| fracture non-union                                              | 2           | 1     |
| fracture mal-union                                              | 0           | 0     |
| implant infection                                               | 0           | 1     |
| superficial infection                                           | 0           | 2     |
| fracture gap                                                    | 0           | 0     |
| painful hardware                                                | 3           | 1     |
| open wound                                                      | 0           | 6     |
| broken nail                                                     | 0           | 0     |
| broken screw                                                    | 0           | 0     |
| pre-operative compartment syndrome                              | 1           | 1     |
| post-operative compartment syndrome                             | 0           | 1     |
| nail migration                                                  | 0           | 0     |
| screw migration                                                 | 0           | 1     |
| elective screw removal                                          | 1           | 0     |
